# Supplementary material for: A novel AIE molecule as a hole transport layer enables efficient and stable perovskite solar cells
Source: Royal Society of Chemistry journal article supplement (doi:10.1039/d1cc00484k), 2021-01-01
Supplement: d1cc00484k1.pdf [file d1cc00484k1.pdf]

## **A Novel AIE Molecule as Hole Transport Layer Enables Efficient and Stable Perovskite Solar Cells**

Bin Huang<sup>a,b</sup>, Yujun Cheng<sup>a</sup>, Hui Lei<sup>a</sup>, Lin Hu<sup>\*c</sup>, Zaifang Li<sup>c</sup>, Xuexiang Huang<sup>a</sup>, Lie  
Chen<sup>\*a</sup>, Yiwang Chen<sup>a,d</sup>

<sup>a</sup>College of Chemistry/Institute of Polymers and Energy Chemistry (IPEC), Nanchang University, 999 Xuefu Avenue, Nanchang, 330031, China.

<sup>b</sup>School of Metallurgical and Chemical Engineering, Jiangxi University of Science and Technology, 156 Ke Jia Road, Ganzhou, 341000, China.

<sup>c</sup>China-Australia Institute for Advanced Materials and Manufacturing (IAMM), Jiaying University, 56 Yuexiu South Avenue, Jiaying, 314001, China.

<sup>d</sup>Institute of Advanced Scientific Research (iASR), Jiangxi Normal University, 99 Ziyang Avenue, Nanchang, 330022, China.

Corresponding author. Tel.: +86 791 83968703; fax: +86 791 83969561. E-mail: chenlie@ncu.edu.cn (L. Chen) and hulin@zjxu.edu.cn

Author contributions: B. Huang, H Lei, and Y. Cheng contributed equally to this work.

## Materials and characterization

UV-vis absorption spectra were recorded on a Perkin Elmer Lambda 750 spectrophotometer. All film samples were spin-cast on quartz slice substrates. For the PL measurement, the TPE-CZ samples were prepared on quartz substrates or in a quartz cuvette. The excitation wavelength is 352 nm. For the PL and TRPL measurements of the perovskite, the samples were also deposited on quartz substrates and tested at a excitation wavelength of 532 nm. PL and TRPL measurements were carried out by a Fluorescence Spectrometer (Edinburgh Instrument, FLS 920). The high-resolution scanning electron microscopy (SEM) cross-section image of the prepared PeSCs was observed using an FEI Nova Nano-SEM 450 system.

For the hole-only devices, a polymer hole transport layer PEDOT:PSS (4083) was coated on the precleaned ITO substrates at 4000 r for 40 s. The substrates were then annealed at 135 °C for 10 min. Subsequently, the perovskite absorber layer ( $\text{CH}_3\text{NH}_3\text{PbI}_3$ ) was deposited on the substrates. The detailed procedure is mentioned below. Then TPE-CZ or Spiro-OMeTAD was spin-coated on top of the perovskite film. Finally, Ag was evaporated through the vacuum evaporation system as top electrode. Current-voltage characteristics were measured by a Keithley 2400 in the dark. The hole mobility of the devices were obtained by the space-charge-limited current (SCLC) method, which can be described by the following equation:

$$J = 9\varepsilon_0\varepsilon_r\mu V^2/8L^3$$

where  $J$  is the current density,  $\mu$  is the hole mobility,  $\varepsilon_0$  is the vacuum permittivity ( $8.85 \times 10^{-12}$  F/m),  $\varepsilon_r$  is the dielectric constant of the material (normally taken to approach 3 for organic semiconductors),  $V$  is the applied bias, and  $d$  is the film thickness.

## Electrochemical characterizations

Cyclic voltammetry (CV) was performed by a Zahner IM6e electrochemical workstation, using Ag/AgCl as the reference electrode, a Pt plate as the counter electrode, and a glassy carbon as the working electrode. TPE-CZ or Spiro-OMeTAD was drop-cast onto the electrode from CB solutions to form thin films. 0.1 mol L<sup>-1</sup> tetrabutylammonium hexafluorophosphate in anhydrous acetonitrile was used as the supporting electrolyte. The scan rate was 0.05 V s<sup>-1</sup>. The  $E_{\text{HOMO}}$  of TPE-CZ and Spiro-OMeTAD are calculated as refer to the eqs

$$E_{\text{HOMO}} = -(E_{\text{ox}} + 4.7) \text{ eV}$$

## Perovskite solar cells fabrication and characterization:

The perovskite solar cells were fabricated on F-doped indium oxide (FTO) pattern glass substrates (Zhuhai Kaivo Optoelectronic Technology Co., Ltd. Sheet resistance  $<15 \Omega$ ) with the following device configuration: FTO/c-TiO<sub>2</sub>/mp-TiO<sub>2</sub>/CH<sub>3</sub>NH<sub>3</sub>PbI<sub>3</sub>/Hole transport layer (HTL)/Ag. First, the FTO glass substrates were cleaned by sequential ultrasonic treatment in detergent, acetone, deionized water, and isopropyl alcohol for 15 min and then dried with a nitrogen stream. The precleaned FTO glass substrates were treated by ultraviolet (UV)-ozone for 20 min in UV chamber. A 30 nm thick TiO<sub>2</sub> blocking layer was sequentially spin coated from a solution containing 0.3 M in n-butyl alcohol. The mesoporous TiO<sub>2</sub> layer was spin coated from a solution containing 1 g 18NRT Dyesol paste in 3.5 ml of ethyl alcohol at 5000 rpm for 30 s and then annealed the substrates at 500 °C for 30 min. The obtained meso-TiO<sub>2</sub> films were infiltrated with PbI<sub>2</sub> (Sigma-Aldrich, 99%) by spin-coating at 3500 rpm for 30 s. The PbI<sub>2</sub> films were dipped into CH<sub>3</sub>NH<sub>3</sub>I (10 mg/mL) (TCI, 99%) solution in isopropanol (Sigma-Aldrich) for 3 min and then annealed at 105 °C for 10 min. The HTL solution was prepared by mixing Spiro-OMeTAD or TPE-CZ (the concentration of Spiro-OMeTAD is 75 mg ml<sup>-1</sup> as the reported work<sup>(1)</sup> and the TPE-CZ concentration optimization process is achieved by trying different concentration of 70 mg ml<sup>-1</sup>, 75 mg ml<sup>-1</sup> and 80 mg ml<sup>-1</sup>), 28 μl tert-butylpyridine and 17 μl of bis(trifluoromethane) sulfonamide lithium salt (Li-TFSI) solution (520 mg in 1 ml acetonitrile) in 1 ml chlorobenzene. The HTL solution was spin-coated onto the perovskite film at 3000 rpm for 30 s. Finally, a 100 nm thick Ag anode (thermal deposition rate of 1.0 Å/s) was deposited on the substrate through a shadow mask to give a device area of 0.06 cm<sup>2</sup> under a vacuum level of 10<sup>-6</sup> Pa. The *J-V* characteristic of the as-prepared PeSCs were tested with a Keithley 2400 under 100 mW cm<sup>-2</sup> simulated AM 1.5 G irradiation (Abet Solar Simulator Sun2000) in a N<sub>2</sub>-filled glove box. The scan rate for *J-V* characteristics was 20 mV s<sup>-1</sup>. The external quantum efficiency spectra (EQE) of the devices was measured by on an IPCE measuring system (Oriel Cornerstone 260 1/4 m monochromator equipped with Oriel 70613NS QTH lamp).

## The synthetic route of TPE-CZ.

Solvents and other chemicals are also commercial available and used as received unless specially stated. NMR spectra were recorded on a Bruker 400 MHz spectrometer and the MALDI-TOF/MS spectrometer was performed by SHIMADZU of AXIMA Assurance. The procedure for synthesis of TPE-CZ: the monomer 3 and 4 were obtained according to the reported literature.<sup>(2)</sup>

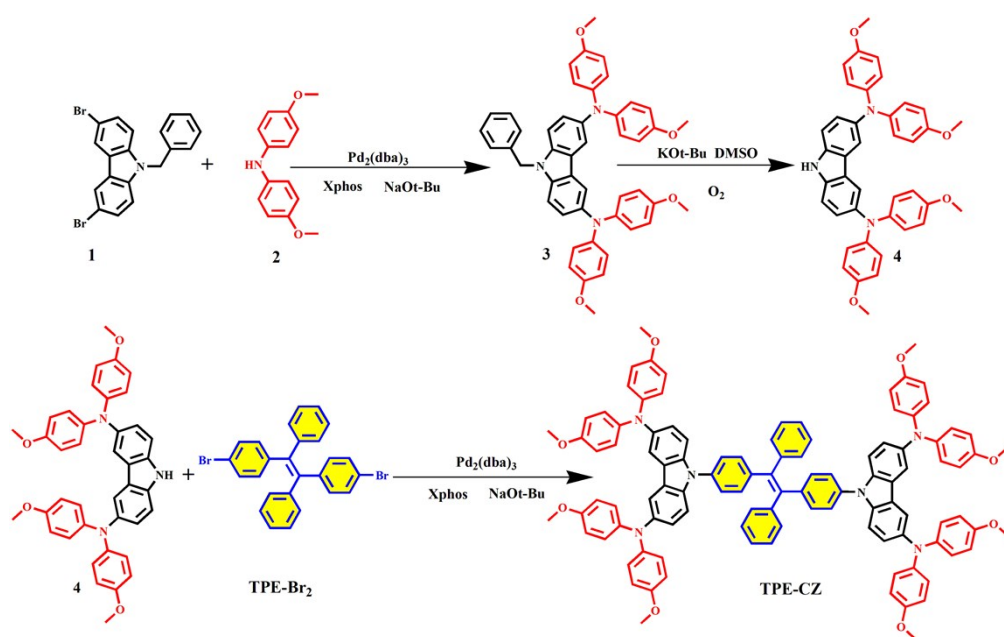

**Scheme 1.** The synthetic routes of TPE-CZ.

TPE- $\text{Br}_2$  (490 mg, 1 mmol), 4 (1.27 g, 2.04 mmol),  $\text{Pd}_2(\text{dba})_3$  (39 mg, 0.04 mmol) and Xphos (29 mg, 0.06 mmol) were dissolved in dry toluene (15 mL). The mixture was purged with nitrogen for 30 minutes at room temperature. After that, sodium tert-butoxide (358 mg, 3.72 mmol) was added. The reaction was heated at reflux (110 °C) for 4 hours under nitrogen atmosphere. The mixture was quenched by adding water and extracted with  $\text{CH}_2\text{Cl}_2$ . The combined organic extracts were dried over  $\text{M}_2\text{SO}_4$ . After removal the solvent under reduced pressure, the crude product was purified by chromatography petroleum ether/ethyl acetate (2:1) to afford 1.18 g of TPE-CZ with yield 75 %. The  $^1\text{H}$  NMR of the compound was shown in Fig S1a. To better identify the the hydrogen on the aromatic rings, DMSO- $d_6$  was used as a deuterated reagent. The  $^{13}\text{C}$  NMR ( $\text{CDCl}_3$ ) spectrum was also provided in Fig. S1b. The NMR and MALDI-

TOF-MS (an isotopic cluster peaking at  $m/z$  of 1570.24, calculating for  $M^+$ ) synergistically confirmed its chemical structure.

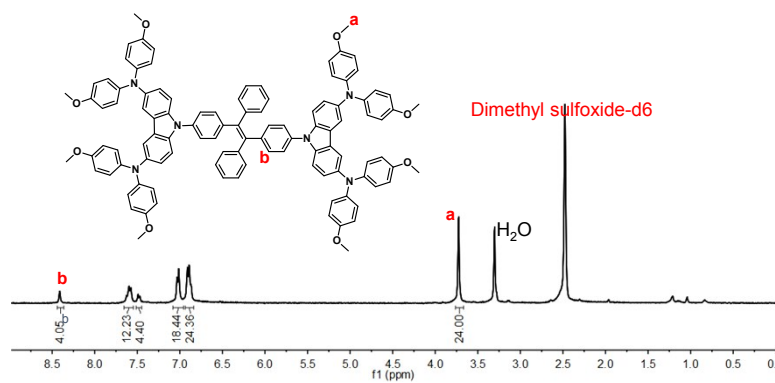

**Fig. S1a** The  $^1\text{H}$  NMR( $d_6$ -DMSO) spectrum of TPE-CZ

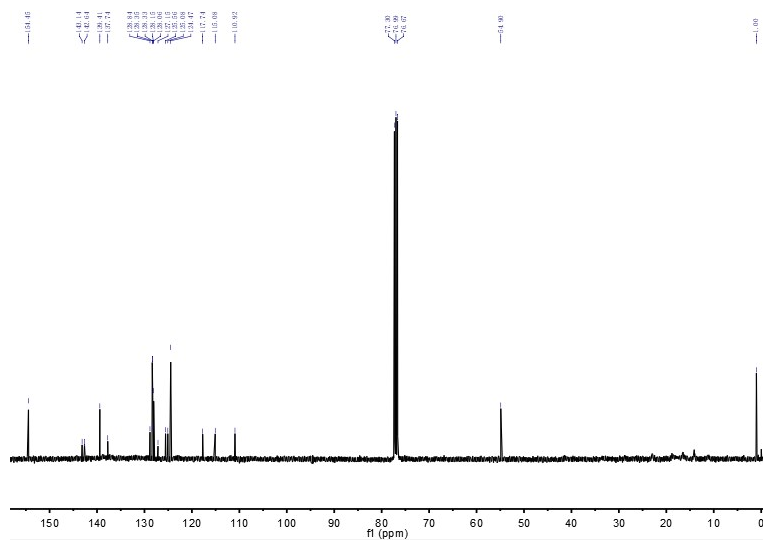

**Fig. S1b** The  $^{13}\text{C}$  NMR ( $\text{CDCl}_3$ ) spectrum of TPE-CZ.

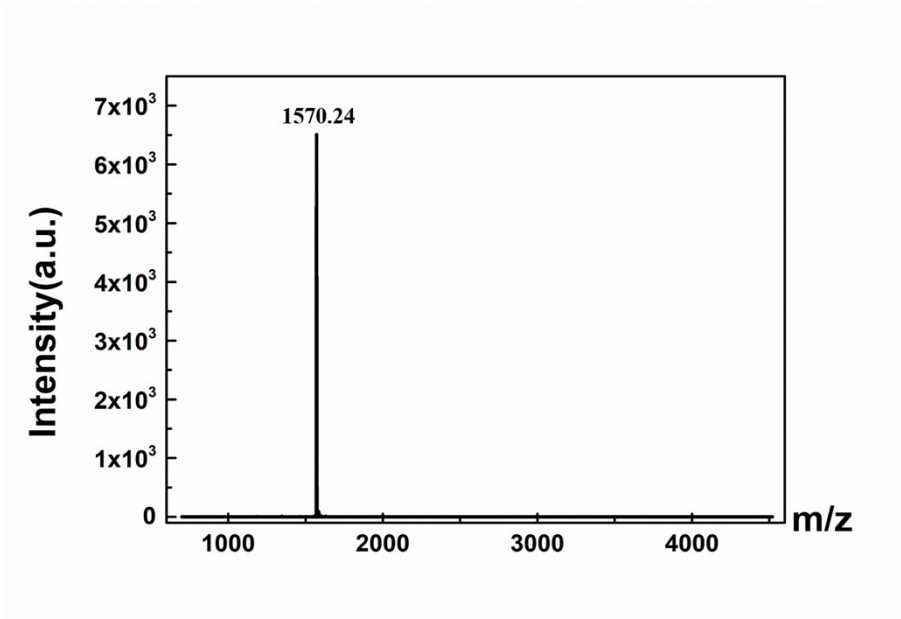

**Fig. S1c** The MALDI-TOF-MS spectrum of TPE-CZ.

**Table S1: Materials costs for the synthesis of TPE-CZ.**

|                   | Chemical                           | Price of Chemical | Chemical cost     | Cost per step        |
|-------------------|------------------------------------|-------------------|-------------------|----------------------|
| <b>Step 1</b>     | Monomer 1                          | 23000.8 \$/1 kg   | 29.90 \$(1.3 g)   | 37.80 \$<br>(1.3 g)  |
|                   | Monomer 2                          | 3659.7 \$/1 kg    | 4.43 \$(1.21 g)   |                      |
|                   | Pd <sub>2</sub> (dba) <sub>3</sub> | 10000.1 \$/1 kg   | 1.50 \$(0.15 g)   |                      |
|                   | Xphos                              | 1626.7 \$/1 kg    | 0.12 \$(0.076 g)  |                      |
|                   | NaOtBu                             | 309.19 \$/25 kg   | 0.007 \$(0.576 g) |                      |
|                   | petroleum ether                    | 60.66 \$/20 L     | 0.30 \$(0.1 L)    |                      |
|                   | ethyl acetate                      | 90.19 \$/20 L     | 1.00 \$(0.02 L)   |                      |
|                   | MgSO <sub>4</sub>                  | 46.2 \$/1 kg      | 0.023 \$(0.5 g)   |                      |
|                   | Silica gel                         | 58.7 \$/1 kg      | 0.35 \$(6.0g)     |                      |
| <b>Step 2</b>     | t-BuOK                             | 500.18 \$/25 kg   | 0.038 \$(1.74 g)  | 2.20 \$<br>(1.27 g)  |
|                   | DMSO                               | 27.75 \$/2 L      | 0.28 \$(0.02 mL)  |                      |
|                   | MgSO <sub>4</sub>                  | 46.2 \$/1 kg      | 0.023 \$(0.5 g)   |                      |
|                   | Silica gel                         | 58.7 \$/1 kg      | 0.32 \$(5.5g)     |                      |
|                   | petroleum ether                    | 60.66 \$/20 L     | 0.30 \$(0.1 L)    |                      |
|                   | ethyl acetate                      | 90.19 \$/20 L     | 1.00 \$(0.02 L)   |                      |
| <b>Step 3</b>     | TPE-Br <sub>2</sub>                | 30912 \$/ kg      | 15.15 \$(490 mg)  | 27.26 \$<br>(1.18 g) |
|                   | Pd <sub>2</sub> (dba) <sub>3</sub> | 10000.1 \$/1 kg   | 0.40 \$(39 mg)    |                      |
|                   | Xphos                              | 1626.7 \$/1 kg    | 0.05 \$(29 mg)    |                      |
|                   | NaOtBu                             | 70.07 \$/5 kg     | 0.005 \$(358 mg)  |                      |
|                   | petroleum ether                    | 60.66 \$/20 L     | 6.17 \$(0.2 L)    |                      |
|                   | ethyl acetate                      | 90.19 \$/20 L     | 5.00 \$(0.1 L)    |                      |
|                   | MgSO <sub>4</sub>                  | 46.2 \$/1 kg      | 0.04 \$(1.00 g)   |                      |
|                   | Silica gel                         | 58.7 \$/1 kg      | 0.32 \$(5.5g)     |                      |
|                   | CH <sub>2</sub> Cl <sub>2</sub>    | 70 \$/20 L        | 0.10 \$(0.03L)    |                      |
|                   | Toluene                            | 30 \$/20 L        | 0.02 \$(0.015 L)  |                      |
| <b>Total cost</b> |                                    |                   |                   | 67.26 \$<br>(1.18 g) |

The synthetic cost for spiro-MeOTAD has been widely reported as 92-108 \$/g<sup>(3)</sup>, which is much higher than the TPE-CZ.

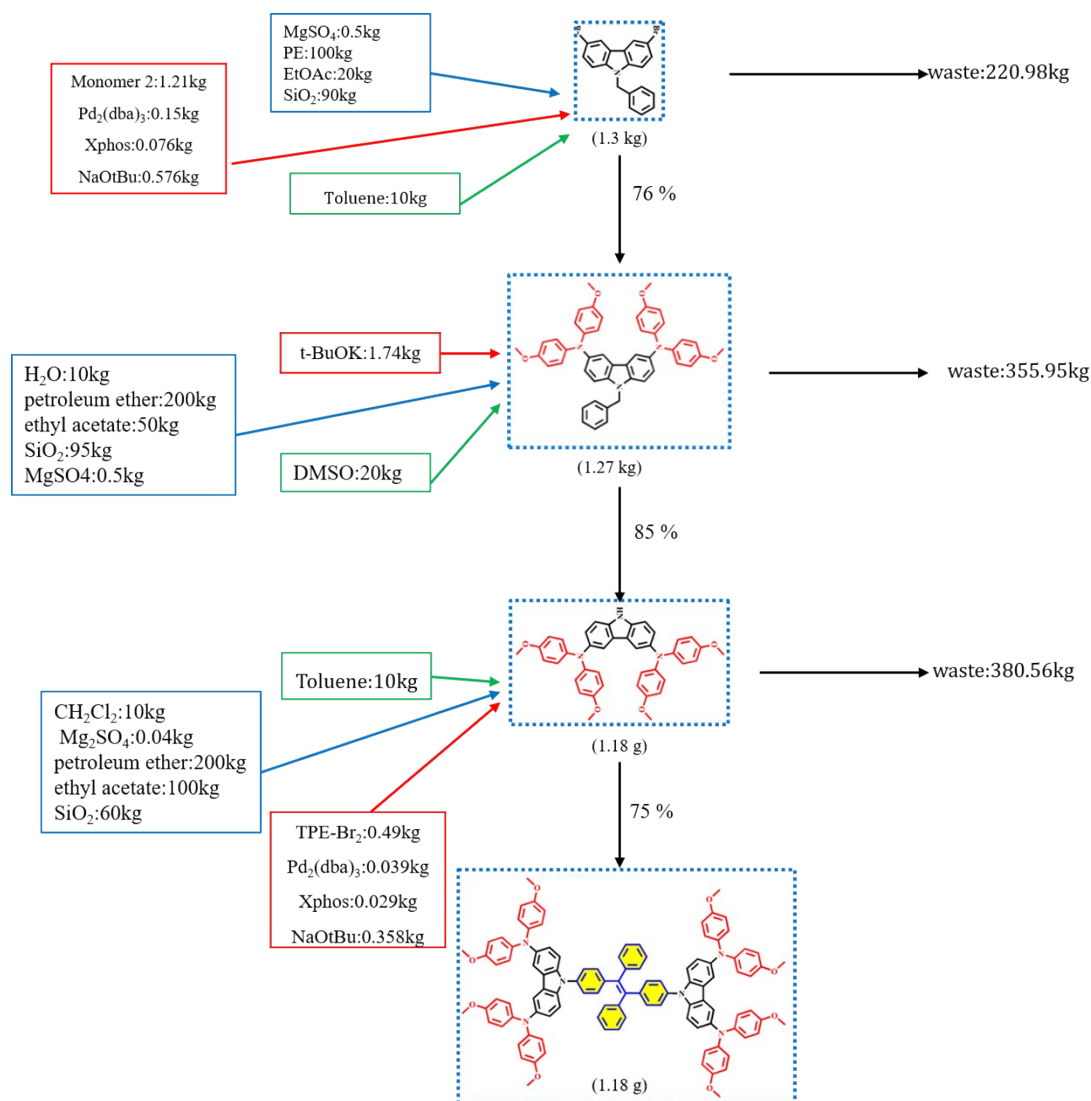

**Fig. S2** Flowchart describing the synthesis of 1.1 kg of TPE-CZ. The requisite quantities of reagent (red arrow), solvents (green arrow) and work-up materials (blue arrow) as indicated for each step.



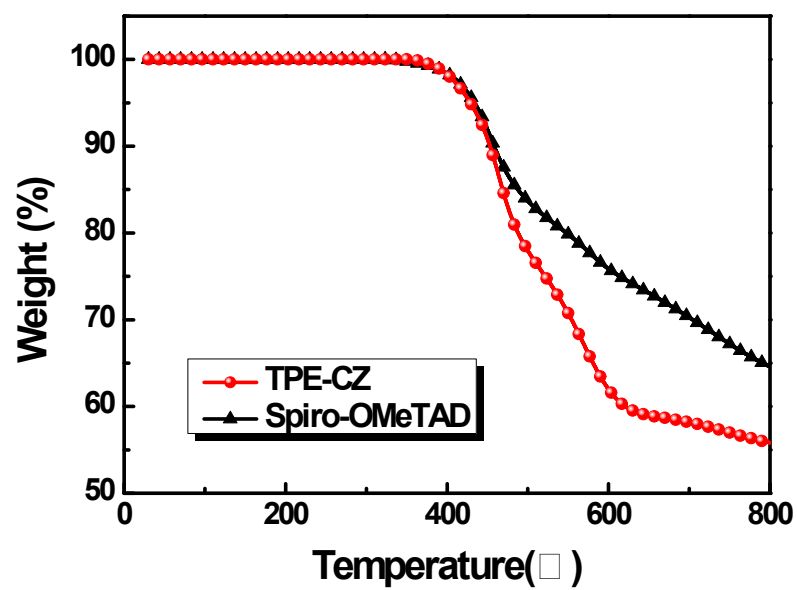

Fig. S3 TGA curves of TPE-CZ and Spiro-OMeTAD.

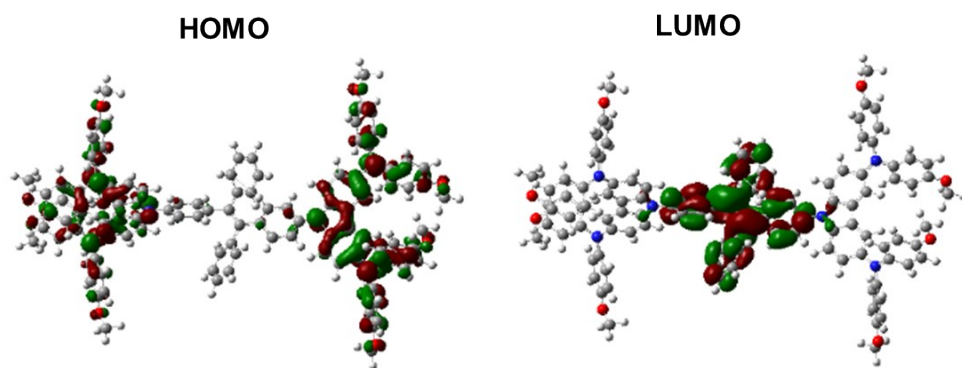

**Fig. S4** Optimized molecular geometries and frontier molecular orbitals of TPE-CZ using DFT evaluated at the B3LYP/6-31G(d) level.

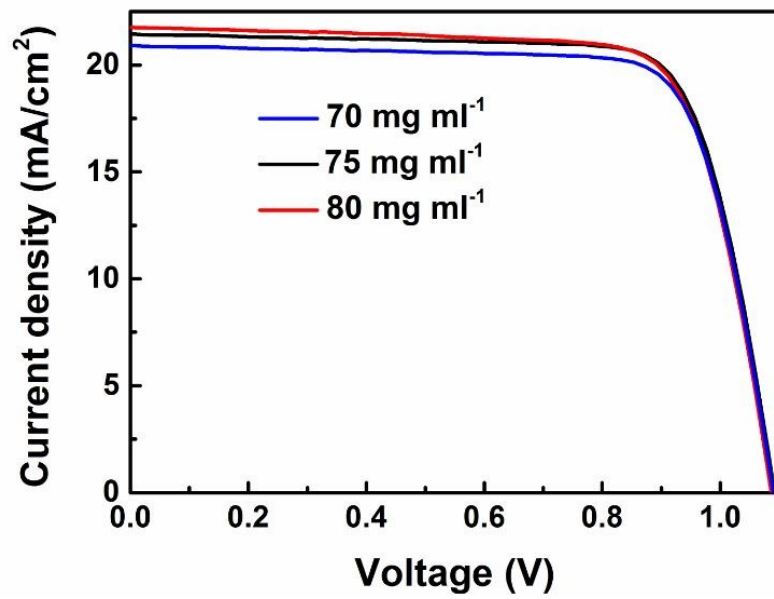

**Fig. S5**  $J$ - $V$  characteristics of PeSCs based TPE-CZ with various mass concentrations.

**Table S2.** The device parameters based on TPE-CZ HTL with different concentrations.

| Concentration (mg ml <sup>-1</sup> ) | $J_{sc}$ (mA cm <sup>-2</sup> ) | $V_{oc}$ (V) | FF (%) | PCE (%) |
|--------------------------------------|---------------------------------|--------------|--------|---------|
| 80                                   | 21.71                           | 1.08         | 75.4   | 17.7    |
| 75                                   | 21.47                           | 1.08         | 77.5   | 18.0    |
| 70                                   | 20.86                           | 1.08         | 76.7   | 17.3    |

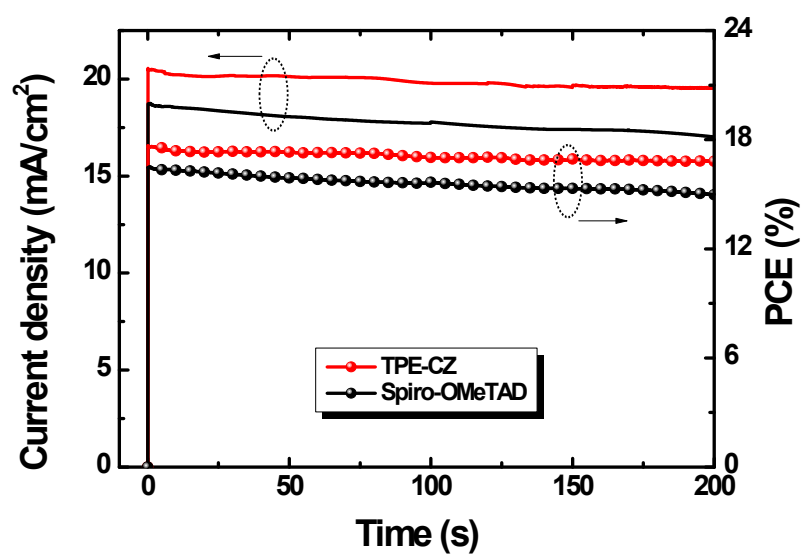

**Fig. S6** Stabilized power output of the PeSCs based on TPE-CZ and Spiro-OMeTAD HTLs, respectively.

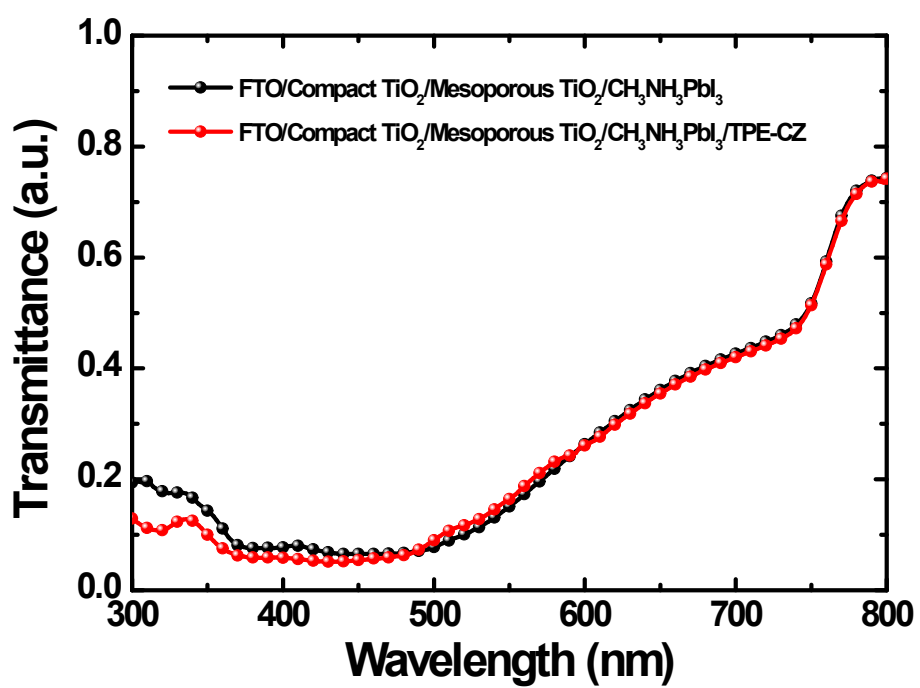

**Fig. S7** Transmittance spectra of the sample FTO/Compact TiO<sub>2</sub>/Mesoporous TiO<sub>2</sub>/CH<sub>3</sub>NH<sub>3</sub>PbI<sub>3</sub> with or without TPE-CZ layer.

**Table S3.** The PL lifetime for the related device.

| Samples                                                        | $\tau_1$ (ns) | A <sub>1</sub> (%) | $\tau_2$ (ns) | A <sub>2</sub> (%) | $\tau_{ave}$ (ns) |
|----------------------------------------------------------------|---------------|--------------------|---------------|--------------------|-------------------|
| CH <sub>3</sub> NH <sub>3</sub> PbI <sub>3</sub>               | 1.8           | 19.4               | 31.9          | 80.6               | 26.1              |
| CH <sub>3</sub> NH <sub>3</sub> PbI <sub>3</sub> /TPE-CZ       | 1.1           | 80.8               | 12.4          | 19.2               | 3.3               |
| CH <sub>3</sub> NH <sub>3</sub> PbI <sub>3</sub> /Spiro-OMeTAD | 1.3           | 74.6               | 14.9          | 25.4               | 4.7               |

All the data are fitted with a biexponential decay model,

$I(t) = A_1 e^{-t/\tau_1} + A_2 e^{-t/\tau_2}$  and the  $\tau_{ave}$  is calculated by the formula

$$\tau_{ave} = \frac{\sum_i A_i \tau_i}{\sum_i A_i}$$

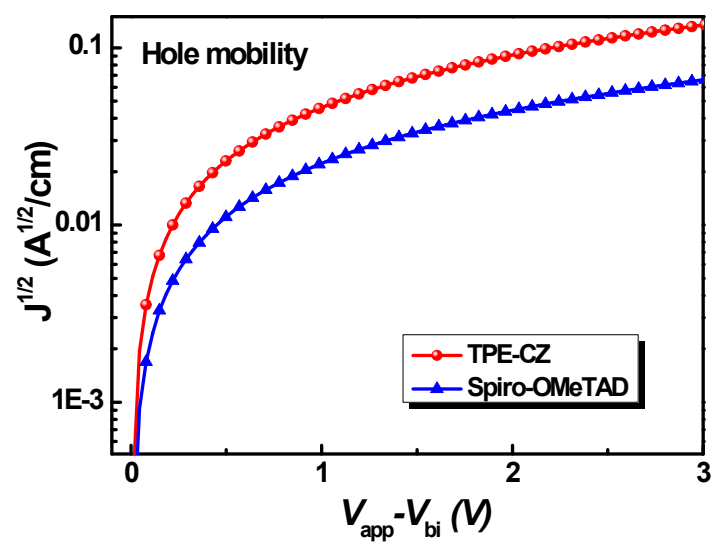

**Fig. S8**  $J$ - $V$  characteristics in the dark of hole-only devices with a structure of ITO/PEDOT:PSS/ $CH_3NH_3PbI_3$ /TPE-CZ or Spiro-OMeTAD/Ag.



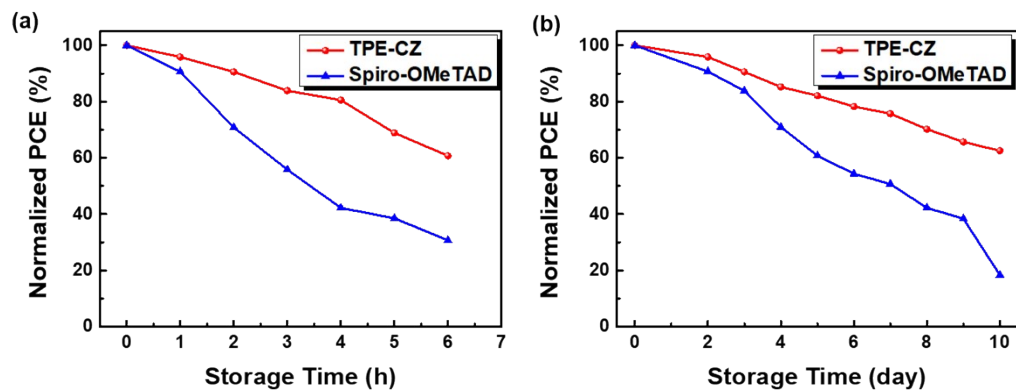

**Fig. S9** (a) Normalized PCE decay of the PeSCs without encapsulation stored in a  $N_2$ -filled glove box under UV light illumination. (b) Normalized PCE decay of the PeSCs without encapsulation stored in a petri dish wrapped with tin foil in ambient.

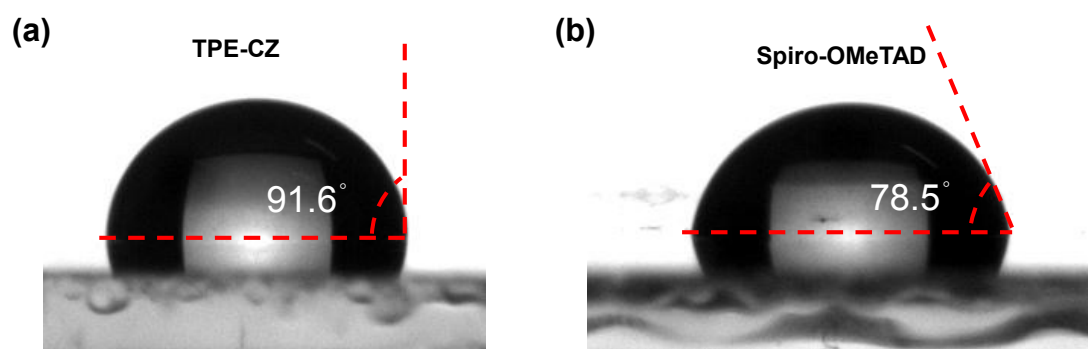

**Fig. S10** Contact angle to deionized water of (a) TPE-CZ and (b) Spiro-OMeTAD.

## References

- (1) B. Huang, Q. Fu, Q. Ai, L. Tan, L. Chen,; Y. Chen, *Mater. Chem. Front.*, 2017, **1**, 1179-1184.
- (2) A. Molina-Ontoria, I. Zimmermann, I. Garcia-Benito, P. Gratia, C. Roldán-Carmona, S. Aghazada, M. Graetzel, M. K. Nazeeruddin, N Martín, *Angew. Chem., Int. Ed.* 2016, **55**, 6270.
- (3) M. Maciejczyk, A. Ivaturi and N. Robertson, *J. Mater. Chem. A.*, 2016, **4**, 4855-4863.
